# Supplementary material for: Combined metabolome and transcriptome to analyze the regulatory network of key enzymes in the synthesis of Senkirkine in Emilia sonchifolia
Source: Research Square preprint supplement (doi:10.21203/rs.3.rs-5428050/v1), 2024-12-16
Supplement: Supplementary file 1 [file 9528f4df4627ee129705ce44.xlsx]

## Sheet: Table1
Table 1 Differential metabolite information table of Alkaloids
Number	Compounds	Class II	Average Relative Content of Substance
			AVERAGE（CBr）	AVERAGE（CBs）	AVERAGE（CBl）	AVERAGE（CBh）
1	1,4-Dihydro-1-Methyl-4-oxo-3-pyridinecarboxamide	Pyridine alkaloids	30681.9	62353.9	108378	57408.9
2	2,4,6,6-Tetramethyl-3(6H)-pyridinone	Pyridine alkaloids	2956.06	175353	5142.15	396900
3	3-Carbamyl-1-methylpyridinium;(1-Methylnicotinamide)	Pyridine alkaloids	409330	1.34435e+07	3.04149e+07	3.76633e+07
4	Nicotinic Acid Methyl Ester(Methyl Nicotinate)	Pyridine alkaloids	26467.7	35898.7	60641.8	85194.2
5	Quinolinic Acid	Pyridine alkaloids	9441	10430.8	9844.91	23663.7
6	3-hydroxy-1-methylpyrrolidin-2-one*	Pyrrole alkaloids	2.59081e+06	6.08486e+06	2.05895e+06	2.22547e+07
7	Adonifoline*	Pyrrole alkaloids	546634	64126.9	239202	1040.89
8	Erucifoline N-oxide*	Pyrrole alkaloids	546634	64126.9	239202	1040.89
9	Integerrimine	Pyrrole alkaloids	25088.3	2.38842e+06	2.60383e+06	3.02076e+06
10	Isatidine	Pyrrole alkaloids	9.01157e+06	627201	352199	1.82693e+06
11	Pyrrolidin	Pyrrole alkaloids	63132.6	313806	70854.8	219327
12	Retronecine	Pyrrole alkaloids	1.22784e+06	1.44151e+06	2.18348e+06	6.1364e+06
13	Senecionine N-oxide	Pyrrole alkaloids	2.20963e+06	3261.33	2161.65	6050.59
14	Seneciphylline N-oxide	Pyrrole alkaloids	8.76058e+06	8241.21	289989	4695.08
15	2-Phenylethylamine	Benzylphenylethylamine alkaloids	40075	32061.3	403629	571815
16	Dopamine	Phenolamine	5739.08	9.65386e+06	7.5612e+07	2.18452e+07
17	N-(2-Hydroxy-4-methoxyphenyl)acetamide	Phenolamine	3.27925e+06	1.50385e+07	9.1118e+06	9.43316e+06
18	N-Feruloylagmatine*	Phenolamine	133275	3095.47	4079.16	713361
19	N-Feruloylputrescine	Phenolamine	31665.1	15704.7	8884.22	766130
20	N1,N8-Bis(sinapoyl)spermidine	Phenolamine	32894.4	139509	65699.6	37098.3
21	Tri-p-coumaroyl Spermidine	Phenolamine	12466.2	8013.04	17915.1	1.0533e+07
22	Vanillylamine	Phenolamine	9017.14	468530	9.09508e+06	1.16642e+06
23	3-quinolinecarboxylic acid	Quinoline alkaloids	6642.38	1.14905e+06	3.04444e+06	735093
24	4-Hydroxyquinoline	Quinoline alkaloids	8430.92	8090.22	3942.52	5441.65
25	4-hydroxy-2-oxo-1,2-dihydroquinoline-3-carboxylic acid	Quinoline alkaloids	39935.1	135172	489327	129994
26	8-hydroxyquinoline	Quinoline alkaloids	152887	558428	69822.7	996893
27	Quinoline-4-carboxylic acid	Quinoline alkaloids	4251.52	2724.66	10368	14735.2
28	Xanthurenic Acid 8-O-Glucoside	Quinoline alkaloids	22712.2	12870.7	10301.2	13125.4
29	Scopine	Tropan alkaloids	1.7017e+06	223171	572619	918093
30	L-Pipecolic Acid	Piperidine alkaloids	1.05217e+07	9.40326e+06	4.39459e+06	3.85717e+06
31	Piperidine	Piperidine alkaloids	675179	8.91541e+06	2.60223e+06	3.1932e+06
32	Triacetonamine	Piperidine alkaloids	553371	106642	307742	496168
33	2-Amino-4,5-dihydro-1H-imidazole-4-acetic acid	Alkaloids	1.21482e+06	3.40445e+06	2.57138e+06	1.56779e+06
34	2-Benzoxazolinone	Alkaloids	6126.27	56789.8	52848.7	22772.3
35	3-Chloroaniline	Alkaloids	2.65091e+06	2.28597e+06	4.90124e+06	803042
36	3-amino-2-naphthoic acid	Alkaloids	5.50818e+06	3.13916e+07	6.77733e+06	1.77458e+07
37	4-Methylazetidine-2-Carboxylic acid*	Alkaloids	1.41462e+06	3.2083e+06	1.09221e+06	1.07567e+07
38	4-methoxybenzamide	Alkaloids	21876.1	180295	205233	695969
39	Acetylpetasitenine	Alkaloids	2.60774e+07	6.72411e+06	8.39609e+06	1.26476e+06
40	Acetylsenkirkine	Alkaloids	1.02241e+07	94200.9	102997	1.83635e+06
41	Azetidine-2-carboxylic acid*	Alkaloids	304052	693882	424915	1.17899e+06
42	Benzamide	Alkaloids	44604.4	31807	437612	632925
43	Choline	Alkaloids	2.33601e+07	1.97757e+07	1.06267e+07	3.41502e+07
44	Cyclohexylamine	Alkaloids	22193.5	117073	217351	34134.4
45	DL-2-Aminoadipic acid	Alkaloids	268383	965764	383827	2.83467e+06
46	Histamine	Alkaloids	155769	420520	687385	271504
47	L-Azetidine-2-carboxylic acid*	Alkaloids	123295	687079	435471	1.16004e+06
48	L-Tyramine	Alkaloids	14942.9	419032	735612	1.21114e+06
49	N-(12-methyltetradecyl)propionamide*	Alkaloids	177547	134287	342491	148386
50	N-Benzylmethylene isomethylamine	Alkaloids	493084	4.28349e+06	1.81601e+06	2.3471e+06
51	N-Oleoylethanolamine	Alkaloids	29476.9	6693.66	4213.56	31192.6
52	Neosenkirkine	Alkaloids	7.83302e+07	7.6508e+06	1.65011e+06	74956
53	Nicotianamine	Alkaloids	150100	386849	279337	1.17067e+06
54	O-Phosphocholine	Alkaloids	5.70017e+06	2.40383e+06	2.1709e+06	7.13565e+06
55	O-Phosphorylethanolamine	Alkaloids	36660.3	13358.1	6417.74	51618.2
56	Pantothenol	Alkaloids	13293.2	18151.7	33253.4	14189.4
57	Petasitenine	Alkaloids	1.22835e+07	4.29205e+06	668498	3.68042e+06
58	Stearamide*	Alkaloids	177759	133203	343973	148596
59	o-Carboxy-5-hydroxytryptamine	Alkaloids	48803.2	1.53797e+06	2.14409e+06	1.27507e+06
60	L-Praziquanamine	Isoquinoline alkaloids	17987.5	66369.8	17078.7	24950.3
61	3-Indoleacetonitrile	Plumerane	87724.2	543423	94166.9	155866
62	3-Indolepropionic acid	Plumerane	25366.3	98094.1	34117.3	73406
63	Indole	Plumerane	131058	358273	151707	247544
64	Indole-3-carboxaldehyde	Plumerane	256212	124798	86248.9	93562.7
65	Methoxyindoleacetic acid	Plumerane	947880	5.06261e+06	1.20156e+06	2.81252e+06
66	Methyl dioxindole-3-acetate	Plumerane	175798	246802	396819	159811
67	N-Acetyl-5-hydroxytryptamine	Plumerane	37739.8	103982	131836	156595
68	Pyran[3,4-b]indole-2-ketone	Plumerane	825344	1.56139e+07	4.71366e+06	9.51053e+06
69	Tryptamine	Plumerane	49766.2	35622.3	48022.4	7.85126e+06

## Sheet: Table2
Table 2 Information Table of Pyrrolizidine Alkaloid Metabolites
Compounds	Abbreviation	Formula
Senkirkine	Sek	C19H27NO6
3-hydroxy-1-methylpyrrolidin-2-one	HMPP	C5H9NO2
Adonifoline	ADO	C18H23NO7
Erucifoline N-oxide	EfNO	C18H23NO7
Integerrimine	INT	C18H25NO5
Isatidine	Isa	C18H25NO7
Pyrrolidin	Py	C4H9N
Retronecine	Re	C8H13NO2
Senecionine N-oxide	SnNO	C18H25NO6
Seneciphylline N-oxide	SpNO	C18H23NO6

## Sheet: Table3
Table 3 Key enzyme information for Sek biosynthesis of E. sonchifolia
Number	Category	Enzyme	Enzyme Number	Number Of Differential Genes
1	methyltransferase	homocysteine S-methyltransferase	K00547	4
2		5-methyltetrahydropteroyltriglutamate--homocysteine methyltransferase	K00549	3
3		caffeoyl-CoA O-methyltransferase	K00588	10
4		glycine hydroxymethyltransferase	K00600	4
5		phosphoethanolamine N-methyltransferase	K05929	3
6		23S rRNA (adenine2503-C2)-methyltransferase	K06941	1
7		[histone H3]-lysine4 N-trimethyltransferase MLL3	K09188	1
8		[histone H3]-lysine4 N-trimethyltransferase MLL3	K11420	3
9		caffeic acid 3-O-methyltransferase / acetylserotonin O-methyltransferase	K13066	7
10		rRNA 2'-O-methyltransferase fibrillarin	K14563	4
11		tRNA guanosine-2'-O-methyltransferase	K15333	5
12		tRNA (guanine37-N1)-methyltransferase	K15429	1
13		tRNA wybutosine-synthesizing protein 1	K15449	1
14		trans-resveratrol di-O-methyltransferase	K16040	2
15		glucuronoxylan 4-O-methyltransferase	K18801	1
16		indole-3-acetate O-methyltransferase	K18848	1
17		benzoate O-methyltransferase	K21482	3
18		salicylate 1-O-methyltransferase	K21483	1
19		acetylserotonin O-methyltransferase, plant	K22588	5
20		protein-lysine N-methyltransferase EEF2KMT	K22696	2
21		putative pectin methyltransferase	K23870	1
22		putative homogalacturonan methyltransferase	K23872	4
23		[histone H3]-lysine9 N-dimethyltransferase	K24405	1
24	alcohol dehydrogenase	alcohol dehydrogenase	K00001	1
25		alcohol dehydrogenase (NADP+)	K00002	10
26		cinnamyl-alcohol dehydrogenase	K00083	5
27		S-(hydroxymethyl)glutathione dehydrogenase / alcohol dehydrogenase	K00121	3
28		cinnamyl-alcohol dehydrogenase	K22395	24
29	acyltransferase	phospholipid:diacylglycerol acyltransferase	K00679	10
30		acetyl-CoA acyltransferase 1	K07513	9
31		shikimate O-hydroxycinnamoyltransferase	K13065	4
32		glycerol-3-phosphate acyltransferase	K13508	4
33		lysocardiolipin and lysophospholipid acyltransferase	K13513	7
34		palmitoyltransferase ZDHHC14/18	K16675	3
35		BAHD acyltransferase	K19747	3
36		palmitoyltransferase ZDHHC1/11	K20027	1
37		anthocyanidin 3-O-glucoside 6''-O-acyltransferase	K21383	3
38		phospholipase A1	K22389	1
39		capsaicin synthase	K24277	2
40	deoxyhypusine synthase	deoxyhypusine synthase	K00809	1
41	cyclase	allene oxide cyclase	K10525	4
42	diamine oxidase	primary-amine oxidase	K00276	2
43	Pyridoxal 5′-phosphate -dependent enzymes	pyridoxal 5'-phosphate synthase pdxS subunit	K06215	2
44		pyridoxal 5'-phosphate synthase pdxT subunit	K08681	1
45		pyridoxal 5'-phosphate synthase / NAD(P)H-hydrate epimerase	K23998	4

## Sheet: Table4
Table 4 Candidate genes for key enzymes in Sek biosynthesis of E. sonchifolia
Enzyme	Abbreviation	Gene ID	Forward primer （5'→3'）	Reverse primer （5'→3'）
BAHD acyltransferase	BAHD-Ats	Cluster-43331.1	GATTGTTGGGTGGATTGGC	AACCTTCTCGGCAGCATCT
anthocyanidin 3-O-glucoside 6''-O-acyltransferase	3 AT	Cluster-64270.2	CCGCTTCCACTGACCTACTT	GCTTTTGCCATCGCCATA
caffeoyl-CoA O-methyltransferase	CCoAOMT	Cluster-58331.3	CACCCTTGGAATCTTATGACGA	GGCTTGTAGAATTGGGAGTTTGT
benzoate O-methyltransferase	BOMT	Cluster-41124.0	GGGTTGGTTCAAGAATCGG	TTGGCACAACTCGTGGACTA
cinnamyl-alcohol dehydrogenase	CAD	Cluster-32969.0	ACTTCCACAACTCCAAAACCA	GCCCAAAACAAGTCTTCCC
ubiquitin-protein ligase	UPL	Cluster-56287.6	CCTGATGGCAAGGAAGATG	AGGTTTAGGAACTCTGGGAAGT
